# Supplementary material for: Serological cross-reactivity between Crimean-Congo haemorrhagic fever virus and Nairobi sheep disease virus glycoprotein C
Source: Front Immunol. 2025 Jan 20;15:1423474. doi: 10.3389/fimmu.2024.1423474 (PMC11788166; doi:10.3389/fimmu.2024.1423474)
Supplement: Supplementary Figure 1 — Fold-increase of sheep antibody responses to various bunyavirus antigens following NSDV infection. [file DataSheet1.xlsx]

## Sheet: Table S1
	Animal	NSDV				CCHFV				RVFV			DUGV
timepoint	#	NP	Gn	Gc	Virus	NP	Gn	Gc	VectoCrimean	NP	Gn	Gc	NP
0dpi	VU15	0.243	0.011	0.011	0.047	0.05	0.022	0.019	0.045	0.082	0.033	0.024	0.06
	VU16	0.33	0.021	0.02	0.081	0.195	0.044	0.035	0.044	0.085	0.057	0.052	0.019
	VU17	0.28	0.017	0.138	0.054	0.065	0.028	0.11	0.044	0.106	0.087	0.04	0.031
	VU18	0.277	0.063	0.03	0.085	0.045	0.019	0.043	0.043	0.073	0.076	0.025	0.025
	VU19	0.362	0.029	0.05	0.049	0.059	0.028	0.03	0.035	0.164	0.057	0.027	0.023
	VU20	0.29	0.008	0.008	0.034	0.067	0.052	0.019	0.024	0.092	0.029	0.03	0.083
7dpi	VU15	0.305	0.017	0.119	0.154	0.063	0.021	0.064	0.077	0.076	0.039	0.03	0.065
	VU16	0.362	0.032	0.08	0.141	0.159	0.035	0.079	0.04	0.108	0.061	0.052	0.029
	VU17	0.283	0.042	0.195	0.095	0.062	0.029	0.147	0.046	0.103	0.077	0.043	0.007
	VU18	0.283	0.074	0.132	0.205	0.096	0.055	0.139	0.059	0.138	0.107	0.085	0.039
	VU19	0.356	0.084	0.2	0.18	0.101	0.072	0.123	0.046	0.193	0.104	0.068	0.015
	VU20	0.285	0.03	0.116	0.197	0.11	0.063	0.085	0.051	0.112	0.061	0.06	0.075
9dpi	VU15	0.275	0.042	0.247	0.233	0.044	0.02	0.204	0.081	0.056	0.039	0.022	0.115
	VU16	0.335	0.124	0.178	0.195	0.166	0.041	0.231	0.054	0.125	0.066	0.062	0.066
	VU18	0.298	0.081	0.271	0.265	0.137	0.066	0.245	0.088	0.186	0.111	0.093	0.084
11dpi	VU15	0.297	0.063	0.29	0.252	0.043	0.016	0.24	0.059	0.054	0.025	0.017	0.062
	VU16	0.338	0.268	0.252	0.225	0.177	0.039	0.27	0.045	0.136	0.074	0.08	0.03
	VU18	0.16	0.139	0.319	0.231	0.109	0.065	0.292	0.07	0.229	0.098	0.078	0.056
Average at 0 dpi		0.297	0.0248333	0.0428333	0.0583333	0.0801667	0.0321667	0.0426667	0.0391667	0.100333	0.0565	0.033	0.0401667
Standard deviation at 0 dpi		0.0423509	0.0201238	0.0490323	0.020255	0.0568943	0.0129987	0.0342734	0.0082805	0.0330857	0.0228889	0.0109545	0.0256314

## Sheet: Table S2
PMID	Interest	Immunological sample	CCHFV strain studied	Motifs on CCHFV IbAr10200-derived Gc	Total number of Motifs	Nb of Conserved motifs	Percentage of conservation (%)	Ambiguities	Antigen
16298978	11E7 epitope	Mouse 11E7 mAb	IbAr10200	SGLKFAS…GKQNDTC (GP aa1443-1566)	124	57	45.9677		Gc
25365026	NP-specific epitope mapping	CCHFV-exposed sheep serum	YL04057	FDEAKK	6	1	16.6667		NP
				VEAL	4	1	25
				NGYLNKH	7	1	14.2857
				EVDKA	5	2	40
				DSMITN	6	0	0
28842265	Mab epitope	Mouse 11E7 mAb	IbAr10200	NTSWMSWDGCDLDYY	15	14	93.3333		Gc
				NIQQKLPPEIITLHP	15	4	26.6667
				LNIETDYTKNFHFHS	15	11	73.3333
		Mouse 8A1 mAb		FKYRHLKDDEETGYR	15	3	20
				KDLFTDYMFVKWKVE	15	6	40
				EPHFNTSWMSWDGCD	15	11	73.3333
		Mouse 30F7 mAb		IKTEAIVCVELTSQE	15	8	53.3333
				KDLFTDYMFVKWKVE	15	6	40
				SLETSLSIEAPWGAI	15	11	73.3333
28250124	GP-specific epitope mapping	CCHFV-infected mouse serum	IbAr10200	LKGDRVNGHLIHKIESHFNT	20	7	35		Gc
				IESHKCYCSLFCCPYCRHCS	20	n/a	n/a	** part of Gn	Gn
29985929	GP-specific epitope mapping	CCHFV-exposed human serum	Turkey-Kelkit06	RKPLFLDSTAKGMKNLLNST	20	5	25	RKPLFLDSIVKGMKNLLNST	Gc
				SLETSLSIEAPWGAINVQST	20	14	70	SLETSLSIEAPWGAINVQST
				EIITLHPRIEEGFFDLMHVQ	20	8	40	EIITLHPKIEEGFFDLMHVQ
				EGFFDLMHVQKVLSASTVCK	20	11	55	EGFFDLMHVQKVLSASTVCK
				DYYCNMGDWPSCTYTGVTQH	20	15	75	DYYCNMGDWPSCTYTGVTQH
				FASLACTGCYACSSGISCKV	20	10	50	FASLACTGCYACSSGISCKV
				PQSILIEHKGTIIGKQNSTC	20	13	65	PQSILIEHKGTIIGKQNDTC
31627038	Gc-specific epitope mapping	CCHFV-exposed sheep serum	YL04057	VEDASES	7	5	71.4286	VEDASES	Gc
				GDRQVGE	7	4	57.1429	GDRQVEE
				EIITLHP	7	2	28.5714	EIVTLHP
				DLQVYHIGNLKGDKV	15	7	46.6667	DFQVYHVGNLRGDKV
				GDTPQLDL	8	5	62.5	GDTPQLDL
				PQLDLKAR	8	6	75	PQLDLKAR
				HVKSDD	6	2	33.3333	HVRSSD
32479862	NP & GP-specific epitope mapping	CCHFV-exposed goat/sheep/bovine serum	NIV 112143	NRGGDENPRGPVSHE	15	10	66.6667	NRGGDENPRGPVSRE	NP
				NPPWGDINKSGRS	13	11	84.6154	NPPWGDINKSGRS
				PGPDETSTPSGTGKE	15	n/a	n/a	** part of Gn	Gn
				DQGPTENNNHNS	12	n/a	n/a	** part of Gn
				TQDTHPSPTNRSKRN	15	n/a	n/a	** part of Gn
20960283	Mab epitope	14B7 and 43E5 Mab	YL04057	LAKLAE…AQGAQ (NP aa235-305)	71	28	39.4366		NP
23933073	NP-specific epitope mapping	CCHFV-exposed human serum	SPU 415/85	LTGYQ…CFGTI (NP aa123-396)	274	179	65.3285		NP
				NRGGDENPRGPVSH	14	9	64.2857	NRGGDENPRGPVSR
25185583	GP-specific epitope mapping	CCHFV-exposed human serum	SPU103/87	RCGCTSSTCLHKEWPHSRN	19	15	78.9474		Gc
				LHKEWPHSRNWRCNPTWCW	19	17	89.4737
				ACTGCYACSSGISCKVRIH	19	9	47.3684	TCTGCYACSSGISCKVRIH
				FMFGWRILFCFKCCRRTRG	19	7	36.8421
				CFKCCRRTRGLFKYRHLKD	19	6	31.5789
30235312	NP-specific epitope mapping	CCHFV-exposed sheep serum	YL04057	NLILNRGG	8	6	75		NP
				GGDENP	6	2	33.3333
				PMKWGKK	7	7	100	PLKWGKK
				FADDS	5	5	100
				NPDDAA	6	6	100
				DIVASEHL	8	8	100
				EHLLHQSL	8	8	100
				SPFQNAY	7	7	100
				NATSANII	8	6	75
34077751	GP-specific epitope mapping	Human mAbs	IbAr10200	V(1093);V(1124);S(1128);W(1185);W(1199);I(1229);K(1297);L(1307);S(1309);V(1314);D(1352);G(1353);K(1393);L(1450);E(1500);D(1504);L(1518);F(1520);I(1522)	20	10	50		Gc
34793197	GP-specific epitope structure	Human mAbs	IbAr10201	V(1093);V(1124);S(1128);W(1185); W(1091);W(1199);I(1229);K(1297);L(1307);S(1309);V(1314);D(1352);G(1353);N(1386);K(1393);E(1500);D(1504)	17	9	52.9412		Gc
35336951	NP-specific epitope mapping	CCHFV-exposed human serum	IbAr10200	GEIVM…KAGVT (NP aa 160-320)	161	96	59.6273		NP
				AWVSSTGIVKKGLEWFEKNA	20	12	60
				LKWRKDIGFRVNANTAALSN	20	12	60
				LNRGGDENPRGPVSHEHVDW	20	14	70
				MAFNPPWGDINKSGRSGIAL	20	16	80
				YKNSSALRAQSAQIDTAFSS	20	16	80
				LFELGKQPRGTKKMKKALLS	20	17	85
				TKKMKKALLSTPMKWGKKLY	20	15	75
				KSILNLRTNTETNNPCAKTI	20	12	60
				FNIQDMDIVASEHLLHQSLV	20	17	85
				SEHLLHQSLVGKQSPFQNAY	20	19	95

## Sheet: Table S3
ELISA	Inter-Assay coefficient of variation		Intra-assay coefficient of variation
Anti-NSDV NP ELISA	11 dpi NSDV-infected sheep VU18	0.238	0.025
	0 dpi NSDV-infected sheep VU18	0.258
Anti-NSDV Gc ELISA	11 dpi NSDV-infected sheep VU18	0.211	0.028
	0 dpi NSDV-infected sheep VU18	0.082

## Sheet: Table S4
		NSDV-NP
	CCHFV-NP	Number of negatives	Number of positives	Kappa statistic
				(agreement)
	Field samples (n=1197)
	Number of negatives	510	277
	Number of positives	175	235	0.209 (fair)
	Negative samples (UK) (n=180)
	Number of negatives	178	2
	Number of positives	0	0	-
	Experimental samples (n=9)
	Number of negatives	5	4
	Number of positives	0	0	-
		NSDV-Gc
	CCHFV-Gc	Number of negatives	Number of positives	Kappa statistic
	Field samples (n=1197)
	Number of negatives	566	171
	Number of positives	21	439	0.681 (substantial)
	Negative samples (UK) (n=180)
	Number of negatives	173	6
	Number of positives	1	0	-
	Experimental samples (n=9)
	Number of negatives	5	1
	Number of positives	0	3	0.769 (substantial)

## Sheet: Amino acid alignments
Alignment of NP
NP 950237.1 nucleoprotein CCHFV strain IbAr10200 Nigeria	M	E	N	K	I	E	V	N	N	K	D	E	M	N	R	W	F	E	E	F	K	K	G	N	G	L	V	D	T	F	T	N	S	Y	S	F	C	E	S	V	P	N	L	D	R	F	V	F	Q
YP_009361831 nucleoprotein NSDV strain Jilin China	.	Q	.	Q	.	V	A	D	.	.	.	A	I	L	A	.	H	K	T	Y	S	E	K	H	R	.	K	S	V	L	.	.	.	A	.	.	.	.	T	I	.	D	.	S	G	Y	E	V	S
Position on alignment	1	2	3	4	5	6	7	8	9	10	11	12	13	14	15	16	17	18	19	20	21	22	23	24	25	26	27	28	29	30	31	32	33	34	35	36	37	38	39	40	41	42	43	44	45	46	47	48	49
Identity: 60%
Alignment of Gc
NP_950235.1 glycoprotein C CCHFV strain IbAr10200 Nigeria	F	L	D	S	T	A	K	G	M	K	N	L	L	N	S	T	S	L	E	T	S	L	S	I	E	A	P	W	G	A	I	N	V	Q	S	T	Y	K	P	T	V	S	T	A	N	I	A	L	S
ACH99800.1 glycoprotein C NSDV strain 708 Kenya	.	.	N	G	L	Q	D	A	V	R	R	M	T	E	.	H	R	.	L	.	.	V	.	.	D	.	.	.	.	.	.	.	I	E	.	.	.	.	.	V	L	A	.	S	.	.	D	.	.
Position on alignment	1041	1042	1043	1044	1045	1046	1047	1048	1049	1050	1051	1052	1053	1054	1055	1056	1057	1058	1059	1060	1061	1062	1063	1064	1065	1066	1067	1068	1069	1070	1071	1072	1073	1074	1075	1076	1077	1078	1079	1080	1081	1082	1083	1084	1085	1086	1087	1088	1089
Identity: 52.3%
[truncated: 605 more columns]
